## 1 Evolution of life cycles and reproductive traits: insights from the brown algae

2 Svenja Heesch<sup>1\*</sup>, Martha Serrano-Serrano<sup>2\*</sup>, Rémy Luthringer<sup>1</sup>, Akira F. Peters<sup>3</sup>, Christophe  
3 Destombe<sup>4</sup>, J. Mark Cock<sup>1</sup>, Myriam Valero<sup>4</sup>, Denis Roze<sup>4</sup>, Nicolas Salamin<sup>2§</sup>, Susana Coelho<sup>1§</sup>

4  
5 <sup>1</sup>Sorbonne Université, UPMC Univ Paris 06, CNRS, Algal Genetics Group, Integrative Biology of Marine  
6 Models, Station Biologique de Roscoff, CS 90074, F-29688, Roscoff, France. <sup>2</sup>Department of Ecology and  
7 Evolution, University of Lausanne, 1015 Lausanne, Switzerland <sup>3</sup>Bezhin Rosko, 29250 Santec, France.  
8 <sup>3</sup>Bezhin Rosko, 29250 Santec, France. <sup>4</sup>Evolutionary Biology and Ecology of Algae, CNRS, Sorbonne  
9 Université, UC, UACH, UMI 3614, 29688 Roscoff, France.

10

11 \*These authors contributed equally to this work.

12 <sup>§</sup>correspondence: [coelho@sb-roscoff.fr](mailto:coelho@sb-roscoff.fr); [nicolas.salamin@unil.ch](mailto:nicolas.salamin@unil.ch)

### 13 ABSTRACT

14 Brown algae are characterized by a remarkable diversity of life cycles, sexual systems, and  
15 reproductive modes, and these traits seem to be very labile across the whole group. This  
16 diversity makes them ideal models to test existing theories on the evolution of alternation  
17 between generations, and to examine correlations between life cycle and reproductive life  
18 history traits. In this study, we investigate the dynamics of trait evolution for four life-history  
19 traits: life cycle, sexual system, level of gamete dimorphism and gamete parthenogenetic  
20 capacity. We assign states to up to 70 species in a multi-gene phylogeny of brown algae, and  
21 use maximum likelihood and Bayesian analyses of correlated evolution, taking phylogeny into  
22 account, to test for correlations between life history traits and sexual systems, and to  
23 investigate the sequence of trait acquisition. Our analyses are consistent with the prediction  
24 that diploid growth may evolve because it allows the complementation of deleterious  
25 mutations, and that haploid sex determination is ancestral in relation to diploid sex  
26 determination. However, the idea that increased zygotic and diploid growth is associated with  
27 increased sexual dimorphism is not supported by our analysis. Finally, it appears that in the  
28 brown algae isogamous species evolved from anisogamous ancestors.

### 29 INTRODUCTION

30 The life cycle of an organism is one of its most fundamental features and influences the  
31 evolution of a variety of traits, including mode of reproduction, developmental processes,  
32 mode of dispersal, adaptation to local environment and ecological success. A wide variety of  
33 different life cycles are found within eukaryotes, and one of the great challenges of  
34 evolutionary biology is to understand how this diversity has evolved, and how each type of life

35 cycle is stably maintained on an evolutionary timescale (Valero et al. 1992; Mable and Otto  
36 1998; Otto and Gerstein 2008; Cock et al. 2014).

37 The sexual life cycle of eukaryotes involves the fusion of two gametes to form a zygote,  
38 followed by meiosis. Such life cycles can be divided into three main types (Bell 1982; Valero et  
39 al. 1992; Coelho et al. 2007; Otto and Gerstein 2008). In organisms with haplontic cycles,  
40 mitosis only occurs during the haploid phase of the life cycle, and syngamy is followed  
41 immediately by zygotic meiosis, without any mitotic division of the zygote. In diplontic life  
42 cycles, mitosis occurs exclusively in the diploid phase, and meiosis takes place immediately  
43 before gamete formation. Between these two 'extremes' lie diplohaplontic (or haploid-  
44 diploid) life cycles, in which mitosis occurs both during the haploid and diploid phases. Both  
45 phases of the cycle may remain unicellular (e.g. budding yeast) or develop into multicellular  
46 organisms during either one phase (e.g. some fungi genera like *Ustilago*) or during both  
47 phases (brown, green, red macroalgae). In photosynthetic organisms, multicellular haploid  
48 phases are usually termed gametophytes, with gametes formed in specific organs called  
49 gametangia. Diploid mitosis leads to asexual reproduction in unicellular lineages (e.g.  
50 diatoms) and to somatic growth and differentiation in multicellular organisms such as vascular  
51 plants. In photosynthetic organisms, multicellular diploid phases are called sporophytes, and  
52 haploid meiospores are produced via meiosis. Diplohaplontic life cycles may be iso- or  
53 heteromorphic. For the latter, the dominant phase may be haploid (such as in mosses) or  
54 diploid (such as in vascular plants and kelps). Asymmetry in terms of the length and  
55 complexity of the haploid and diploid phases can be very strong and can eventually lead to  
56 transitions towards diplontic or haplontic life cycles.

57 The structure of an organism's life cycle also has important consequence for the evolution of  
58 its sex determination system (Coelho et al. 2018). Haploid sex determination is common in  
59 diplohaplontic lineages such as in brown algae, where either a single gametophyte produces  
60 gametes of both sexes (a monoicous system, Table 1), or male and female gametes are  
61 produced by different haploid gametophytes (dioicous systems, e.g. in mosses and kelps). In  
62 gymnosperms and angiosperms (which also have diplohaplontic life cycles), sex is determined  
63 in the diploid phase (since sexual differentiation occurs when male and female reproductive  
64 organs develop), and the organism may be co-sexual (monoecious or hermaphroditic) if a  
65 single sporophyte produces female and male gametes (eggs and sperm) or dioecious if male  
66 and female gametes are produced by two different individuals. Correlations between the type  
67 of sexual system and life history features such as spore size, antheridium number, ploidy level  
68 and diversification rate are relatively well studied in angiosperms and mosses (Villarreal and

69 Renner 2013; Goldberg et al. 2017) but studies of other eukaryotic groups are virtually  
70 inexistent.

71 One important feature of sexual life cycles in eukaryotes is the degree of similarity between  
72 male and female gametes. This 'gamete dimorphism' is a continuous trait, and a number of  
73 models have been proposed to explain how anisogamous organisms could evolve from an  
74 isogamous ancestor (Charlesworth 1978; Hoekstra 1980; Randerson and Hurst 2001). The  
75 evolution of anisogamy establishes the fundamental basis for maleness and femaleness, and  
76 leads to an asymmetry in resource allocation to the offspring, leading in many cases to sexual  
77 selection (Billiard et al. 2011). Anisogamy and oogamy have arisen repeatedly across the  
78 eukaryotes, and these systems are thought to be derived from simpler isogamous mating  
79 systems, either due to disruptive selection generated by a trade-off between the number of  
80 offspring produced and offspring survival (e.g., Charlesworth 1978; Parker 1978; Bell 1982;  
81 Bulmer and Parker 2002), to selection to maximize the rate of gamete encounter (e.g., Cox  
82 and Sethian 1984; Hoekstra 1987; Dusenbery 2000; Togashi et al. 2012) or as a mechanism to  
83 reduce cytoplasmic conflicts (e.g., Hurst & Hamilton 1992, Hutson & Law 1993, Hurst 1995).

84 Differences in gamete size in anisogamous and oogamous species may influence other  
85 reproductive characteristics. In particular, gamete size may be one of the factors that  
86 determines whether a gamete is capable of undergoing asexual reproduction through  
87 parthenogenesis, should it fail to encounter a gamete of the opposite sex (Hoekstra 1980,  
88 Billiard et al 2011). Parthenogenesis is a form of asexual reproduction, in which gametes  
89 develop in the absence of fertilisation, and is commonly found in land plants, algae and  
90 invertebrate organisms, as well as in a number of vertebrate species (e.g. Dawley and Bogart  
91 1989). In animals and land plants, parthenogenesis has been mostly described for females  
92 only, but in organisms with moderate levels of gamete dimorphism such as some brown  
93 algae, development from both male and female gametes in the absence of fertilisation is  
94 quite common, at least under laboratory conditions (e.g. Oppliger et al. 2007; Bothwell et al.  
95 2010).

96 The different types of life cycles have evolved independently and repeatedly in different  
97 eukaryotic groups, and this is also the case for the types of sexual systems. Testing  
98 evolutionary hypotheses regarding the causes and consequences of life history trait diversity  
99 requires data from multiple species placed in a phylogenetic context. Such comparative  
100 studies have been hampered by a lack of accessible data regarding life cycles, sexual systems  
101 and sex determination mechanisms across the eukaryotic tree of life, and most specifically in  
102 groups outside animals and land plants. While knowledge has been recently growing on the  
103 green lineage with studies extending to bryophytes and volvocine algae (Villarreal and Renner

104 2013; Hanschen et al. 2018), we still lack views on other eukaryotic groups, that should help  
105 us understand the general principles underlying the evolution of these traits.

106 The brown algae represent a fascinating group for studies of the evolution of life cycles and  
107 reproductive traits (Bell 1997; Clayton 2009). Brown algae exhibit a remarkable range of life  
108 cycle and sexual traits. Most brown algae have diplohaplontic life cycles, in which a haploid  
109 gametophytic generation alternates with a diploid sporophytic generation (Figure 1). These  
110 two generations show variable levels of dimorphism, ranging from isomorphic (with  
111 gametophytes and sporophytes of the same size and appearance) to strongly heteromorphic  
112 (where the generations are of different size and/or appearance) with either a dominant  
113 gametophytic or a dominant sporophytic generation. In two orders, the Fucales and the  
114 Tilopteridales, diplontic life cycles have evolved, with all members of the Fucales being  
115 diplonts, but only a single species in the Tilopteridales. In diplonts, the gametophytic  
116 generation is reduced to a single cell (the gamete), male and female gametes being released  
117 directly from the diploid sporophyte, either from the same (monoecy/hermaphroditism) or  
118 from two separate thalli (dioecy). In contrast, in all other sexual brown algal species, sexuality  
119 is expressed in the haploid phase (gametophyte), with male and female gametes either  
120 produced on the same thallus (monoicy) or on two separate male and female gametophytes  
121 (dioicy) (Silberfeld et al. 2010; Luthringer et al. 2015). Here, we will use here the term  
122 'monoecy' to describe Fucales species that are co-sexual, although the term hermaphrodite is  
123 also employed in the literature, because male and female structures are produced in the  
124 same conceptacle.

125 In 1997, Bell used the diversity of life cycles within the brown algae to test hypotheses on the  
126 evolution of life cycles; in particular, whether evolution generally proceeds towards an  
127 increase of the diploid phase at the expense of the haploid phase (Clayton, 1988), and  
128 whether a positive association between a prolonged haploid phase and the rate of inbreeding  
129 (as predicted by theories based on the effect of deleterious alleles, Otto and Marks 1996) is  
130 observed (using gametophyte monoicy as a proxy for inbreeding by assuming that  
131 gametophytic selfing may occur). However, his study was based on a phylogenetic tree  
132 including only 14 species, and evolutionary relationships between brown algal orders were  
133 poorly resolved, making it difficult to test his assumptions.

134 In this study, we have exploited a well-resolved phylogeny of 70 species of brown algae  
135 (Silberfeld et al. 2010) to understand how life cycle and reproductive traits evolve across the  
136 brown algae. We performed an extensive literature review to recover information for life  
137 cycle and reproductive traits across the brown algae (Supplemental Dataset). We estimated  
138 ancestral states for each of the traits, as well as the number of transitions between states and

139 their relative timing, and assessed correlations between the life cycle and reproductive traits.  
140 These analyses have allowed us to describe the evolution of life cycles and reproductive traits  
141 across the brown algal phylogeny, and to assess a number of long standing hypotheses about  
142 the evolution of life cycle and reproductive traits such as: 1) the possibility that diploid growth  
143 evolved because it allows the complementation of deleterious mutations (Crow and Kimura  
144 1978, Perrot et al. 1994, Jenkins and Kirkpatrick 1995, Otto & Goldstein 1992, Otto & Marks  
145 1996), 2) that increased zygotic and diploid growth is associated with increased sexual  
146 dimorphism (Bell, 1994), 3) that haploid sex determination is ancestral in relation to diploid  
147 sex determination, 4) that anisogamous species evolved from isogamous ancestors (Parker et  
148 al 1972, Bell 1978, Charlesworth 1978). We also test additional hypotheses, including the  
149 possibility that gamete size influences the capacity for asexual reproduction through  
150 parthenogenesis (Luthringer et al. 2015), and we discuss the macro-evolutionary dynamics of  
151 transitions between sexual systems in the brown algae.

## 152 RESULTS

### 153 Ancestral state estimations and transitions between states

154 We used sequence data from 131 brown algae species to infer a phylogenetic tree (Figure 2).  
155 We estimated the ancestral state of each of the four main sexual traits: type of life cycle, type  
156 of sexual system, level of gamete dimorphism, and parthenogenetic capacity. Definitions of  
157 the life cycle and sexual terms used in this study are provided in Table 1. Our ancestral state  
158 reconstructions inferred equal rates of transition (ER model) between states for all traits,  
159 except for the trait 'sexual system' where rates were different between states but  
160 symmetrical (SYM model gain or loss of a trait). These patterns indicate an overall complex  
161 evolutionary history for all sexual traits, involving multiple gains and losses (Figure 3, Table 2).

162 **Life cycle.** On the basis of ancestral state reconstructions, the ancestor of all brown algae had  
163 a diplohaplontic life cycle, with either isomorphic multicellular generations or with a larger  
164 and morphologically more complex diploid than haploid generation (Figure 3A, Table 2).  
165 Transitions between life cycles occurred most frequently from diploid-dominant to equally  
166 dominant generations (i.e., involving a decrease in complexity of the sporophyte and  
167 concomitant increase in the complexity of the gametophyte; Figure 3A). A change of  
168 dominance from a diploid-dominant to a haploid-dominant life cycle occurred for the first  
169 time at least 57.5 ( $\pm 5.05$ ) My ago (Figure 3A-B). Transitions from a diploid-dominant to a fully  
170 diploid life cycle occurred twice, about 74.5 ( $\pm 21.41$ ) My ago, in the ancestor of *Tilopteris*  
171 *mertensii* (Turner) Kützing and in the ancestor of the diploid order Fucales. Note however that

172 *Tilopteris mertensii* is a rather particular case within Tilopteridales (Kuhlenkamp and Müller  
173 1985) and emergence of monoecy in this species should be interpreted with caution.

174 Overall, our analysis indicated that the dominance relationship between life cycle generations  
175 has been a labile trait in the brown algae, the diplontic life cycle being the only irreversible  
176 state.

177 **Sexual system.** The ancestral brown alga is predicted to have exhibited haploid sex  
178 determination and was most likely dioicous (separate sexes during the haploid phase) (Figure  
179 3A-D, Table 2), but several independent transitions towards monoicy have occurred (Figure  
180 3C-D). The transition from haploid to diploid sex determination, which involved a transition  
181 from dioicy (separate sexes on different haploid gametophytes) to monoecy (both sexes on  
182 the same diploid sporophyte), occurred about 74.5 My ago. This transition was simultaneous  
183 with the transition from a diplohaplontic to a diplontic life cycle (Figure 3B, 3D). Separate  
184 sexes during the diploid stage of the life cycle (dioecy) emerged more recently, around 17.5  
185 Mya, in families of the order Fucales, with the exception of the Sargassaceae and  
186 Notheiaceae, which remained monoecious. Further transitions back to monoecy occurred in  
187 several genera of the Fucaceae (*Xiphophora*, *Pelvetia* and *Fucus*) (Table 2, Figure 3C-D).

188 Overall, our analysis suggests that the transition to diploid sex determination is irreversible  
189 and concomitant with a change in type life cycle (from diplohaplontic to diplontic life cycle). In  
190 contrast, transitions between separate sexes and combined sexes occurred frequently, either  
191 in the haploid or in the diploid phase.

192 **Sexual dimorphism.** Regarding gamete size dimorphism, our analysis suggests that oogamy is  
193 most likely the ancestral state in the brown algae (Table 2, Figure 3E-F). The oldest transition  
194 took place around 114 My ago, from oogamy to isogamy in the lineage leading to the basal  
195 brown algal orders Sphacelariales and Syringodermatales. Another independent transition  
196 from oogamy to isogamy took place in the Ascoseirales. The Scytothamnales include both  
197 isogamous and anisogamous taxa so the direction of the transition is unclear. Transitions from  
198 oogamy to anisogamy are the most frequent transition. Taken together, the results indicate  
199 that gamete size dimorphism level is a remarkably labile trait in the brown algae.

200 **Parthenogenesis.** The gametes of the ancestral brown algae are predicted to have been  
201 unable to perform asexual reproduction through parthenogenesis (Figure 3G-H). The initial  
202 transition from absence of parthenogenesis to female gamete parthenogenesis could not be  
203 accurately traced in time along the early diverging branch separating the subclass  
204 Fucophycidae from the earlier branching Dictyophycidae. The length of this branch renders  
205 identification of the transition during 1 My time bins impossible, as most events fall in

206 different time periods and agreement between reconstructions is very low. The oldest  
207 traceable transition that could be timed, at around 85.5 My, and also the one with the highest  
208 frequency, was from female-only parthenogenesis to parthenogenesis of both female and  
209 male gametes. Note that parthenogenesis is the trait with the lowest sampling, as there is  
210 very limited data about this trait in the literature.

### 211 **Generation dominance and sexual system**

212 Transitions towards the dominance of haploid phase were found to be more frequent when  
213 the sexual system was monoicous (Figure 4,  $q_{21} \gg q_{43}$ ), and overall, switches in life cycle  
214 phase dominance probabilities were higher in monoicous compared to dioecious species,  
215 whatever the direction ( $q_{21}$  and  $q_{12} > q_{43}$  and  $q_{34}$ ; Table 4, Figure 4, Figure S1). In other  
216 words, monoicous species exhibit a higher turnover in terms of generation dominance.  
217 Moreover, transitions from monoicous to dioicous states were slightly more frequently  
218 observed than transitions from dioicous to monoicous, regardless of life cycle phase  
219 dominance (Bayes Factor of 3.51 in favour of the dependent model with  $q_{24} \sim q_{13} > q_{42} \sim$   
220  $q_{31}$ , Figure 4, Figure S1).

### 221 **Generation dominance and sexual dimorphism**

222 We tested if diploid dominance is correlated with an increase in sexual dimorphism. The test  
223 of the dependent versus independent model showed that the difference in likelihood was not  
224 significant (log BF = -0.1080, Table 3), suggesting that the evolution of the traits is not  
225 correlated. Therefore, our data does not support the hypothesis that diploid growth is  
226 associated with increased sexual dimorphism.

### 227 **Gamete biology and sexual systems**

228 Based on the idea that gamete dimorphism evolved to maximize the chances of gamete  
229 encounters, one may hypothesise that separate sexes (dioecy and dioicy) would be associated  
230 with small and abundant male gametes, as a mechanism to ensure that the gametes find a  
231 partner of the opposite sex when gametes are release into seawater. However, we found no  
232 evidence for an association between male gamete size and sexual system (sexes on same  
233 versus different individuals) (Figure S2, Table 3,  $r=0.0909$ ).

234 When gametes are produced by two different individuals, it may be more difficult for a  
235 gamete to find a gamete of the opposite sex than if the same individual produces gametes of  
236 both sexes. Accordingly, we hypothesised that parthenogenesis would be favoured in species  
237 with separate sexes, as opposed to the situation where male and female gametes are  
238 produced by the same individual (note that auto-incompatibility has not been described in



239 the brown algae, with the exception of one study, Gibson 1994). However, we found no  
240 evidence that parthenogenesis was more prevalent in species with separate sexes (Table 3).

241 Finally, we investigated the relationship between the size of male gametes and their  
242 parthenogenetic capacity, under the hypothesis that there is a minimum threshold size for  
243 male gametes, below which parthenogenesis is not possible. The phylogenetic threshold  
244 model indicated that there is a positive correlation between male gamete size and  
245 parthenogenetic capacity (Table 3,  $r=0.4242$ ), however the highest posterior density (HPD)  
246 interval of this correlation includes zero. We therefore complemented this analysis using an  
247 Ornstein Uhlenbeck (OU) model (Hansen 1997; Butler and King 2004; Harmon et al. 2010).  
248 This analysis concluded that the estimated optimal size for non-parthenogenetic male  
249 gametes is significantly lower than that of parthenogenetic male gametes (5.49  $\mu\text{m}$  vs 9.30  
250  $\mu\text{m}$ ; Figure S1, Figure 5). This analysis therefore highlights a significant association between  
251 male gamete size and parthenogenetic capacity.

## 252 DISCUSSION

### 253 Diploid growth evolved to complement deleterious mutations

254 Based on the analysis carried out here, the ancestral brown alga appears to have had a  
255 diplohaplontic life cycle with similar diploid and haploid dominance (i.e., similar size and  
256 complexity of the gametophyte and sporophyte generations). Over evolutionary time, the  
257 diploid phase became dominant in some clades (and haploid dominance decreased) whereas  
258 other clades evolved towards greater haploid dominance. Several theories have been  
259 proposed to explain evolution towards either a dominant haploid or a dominant diploid phase  
260 in the life cycle (e.g., Otto & Gerstein 2008). Hypotheses based on the effect of deleterious  
261 alleles have proposed that being diploid generally increases mean fitness due to the masking  
262 of deleterious alleles (due to complementation of these alleles by non-mutant alleles), while  
263 developing as a haploid allows more efficient purging of deleterious alleles because they are  
264 exposed to selection (Otto & Goldstein 1992, Rescan et al 2016, Scott & Rescan 2017). The  
265 balance between these two forces determines whether evolution proceeds towards an  
266 increase of the haploid or the diploid phase, and depends critically on the importance of  
267 sexual exchanges within populations. Indeed, under higher rates of inbreeding or asexual  
268 reproduction, the benefit of purging deleterious alleles remains associated with alleles  
269 increasing the haploid phase, therefore haploidy is favoured. In contrast, outcrossing and/or  
270 more frequent sex tend to favour diploidy (Otto & Marks 1996). Very few estimates of  
271 inbreeding coefficients or rates of asexual reproduction are available for brown algae but this  
272 idea was tested by Bell (1997) by looking at the correlation between the sexual system of a



273 species (monoicous or dioicous) and the relative dominance (i.e., size) of the haploid and  
274 diploid phases of the life cycle, assuming that monoicous species will tend to be more inbred  
275 due to selfing. At the time, Bell concluded that monoicous species did not tend to have more  
276 dominant haploid phases (Bell 1997). In contrast to Bell's analysis, which was based on a small  
277 number of brown algal species, our results do appear to support Otto and Marks' ideas, at  
278 least to some extent, because transitions towards dominance of the haploid phase were  
279 found to be more frequent when the sexual system was monoicous, consistent with the idea  
280 that monoicy is correlated with haploid growth. Estimates of inbreeding coefficients within  
281 natural populations of monoicous species would be extremely valuable to shed further light  
282 into these phenomena.

283 Somatic mutations have been proposed as another possible source of selection for diploidy,  
284 as these mutations should have a lower impact on the fitness of diploid organisms (e.g., Otto  
285 & Gerstein 2008). This idea is consistent with the general observation that larger organisms  
286 tend to be diploid rather than haploid. Indeed, this pattern holds true for the brown algae,  
287 since all the largest brown algae (e.g., Laminariaceae, Sargassaceae, Fucaceae) have a  
288 dominant diploid phase.

289 Bell (1997) has also proposed that the different biology of spores and gametes should select  
290 for larger sporophytes (allowing efficient dispersal of spores) and smaller gametophytes (so  
291 that gametes are released close to the substratum, in order to facilitate gamete encounters).  
292 While this type of constraint may explain why many brown algal species have a smaller  
293 gametophyte, it does not explain the evolution towards larger gametophytes that occurred in  
294 some clades, nor the transitions towards diploid cycles in which gametes are released by large  
295 diploid individuals.

#### 296 **Diploid growth is associated with increased gamete dimorphism**

297 The theory for the evolution of gamete dimorphism based on the trade-off between gamete  
298 number and offspring fitness predicts that dimorphism may evolve when zygote size has a  
299 strong effect on fitness (i.e. when offspring fitness increases more than linearly in relation to  
300 zygote size). Accordingly, one may predict that if a larger zygote size is needed for larger  
301 diploid development, increased diploid growth would favour higher levels of gamete  
302 dimorphism (Parker et al. 1972). Bell (1994) proposed an alternative theory that also predicts  
303 a correlation between diploid growth and gamete dimorphism, in which the direction of  
304 causality is reversed, i.e., sexual selection caused by gamete dimorphism favouring diplontic  
305 cycles in order to increase genetic differences between gametes produced by the same  
306 organism. Although our results show that diplontic brown algal species are exclusively

307 oogamous, suggesting a link between strong sexual dimorphism and diploidy, those  
308 associations may not be relevant because they are based on only one group, the Fucales.  
309 Therefore, overall, our analyses have not allowed to validate the idea that diploid growth is  
310 associated with increased sexual dimorphism.

### 311 Evolution of sexual systems in the brown algae

312 The ancestral sexual system of brown algae corresponds to haploid sex determination and  
313 dioecy, with several transitions towards monoecy having occurred independently over  
314 evolutionary time. Transition towards a diplontic life cycle in the Fucales involved a  
315 monoecious/hermaphrodite intermediate state, with subsequent independent re-emergence  
316 of dioecy in some lineages. It is interesting to note that transitions from separate sexes to co-  
317 sexuality are relatively frequent in haploid sexual systems, which contrasts to what is the  
318 most commonly accepted direction of evolution in clades with diploid sex determination (i.e.,  
319 monoecy to dioecy). Note, however, that although dioecy was considered to be an  
320 evolutionary dead end in angiosperms, more recent phylogenetic analysis are challenging this  
321 conclusion, and the idea that reversals to monoecy in angiosperms may be more frequent  
322 than thought before is increasingly becoming accepted (Kafer et al. 2017; Pannell 2017).

323 In diploid sexual systems, two main selective effects have been proposed to explain  
324 transitions from co-sexuality to dioecy: inbreeding depression (selfing is less likely to occur  
325 when male and female gametes are produced by separate individuals) and the effect of trade-  
326 offs between male and female fitness (Charlesworth & Charlesworth 1978, Charnov 1982). In  
327 haploid sexual systems, the opposite transition (from separate sexes towards co-sexuality)  
328 could also in principle be caused by a change in the shape of the trade-off between male and  
329 female reproductive success (leading to a higher fitness of gametophytes producing both  
330 types of gametes) or by selection for inbreeding (selfing), either through the automatic  
331 transmission advantage associated with selfing (Fisher 1941) or for reproductive assurance  
332 when population density is low. Note, however, that parthenogenesis occurs in all monoecious  
333 species, and this process may represent an alternative way of dealing with mate limitation  
334 and reproductive assurance. Assuming that selfing occurs following transitions to monoecy,  
335 such transitions should occur more easily when inbreeding depression is low. One would  
336 therefore expect more transitions to monoecy in taxa with a prolonged haploid phase  
337 (assuming that at least a proportion of the deleterious alleles affecting the fitness of diploids  
338 will be purged during the haploid phase of the life cycle), but this is not what we observe here  
339 ( $q_{31} < q_{42}$ , Fig. 4). Examining the proximate mechanisms involved in the transitions between  
340 separate sexes and co-sexuality in both haploid and diploid systems and more natural  
341 population data, for example in populations with different densities, would be valuable to

342 shed light on the mechanisms and evolutionary forces driving the shifts among sexual systems  
343 in the brown algae.

#### 344 **Anisogamy is ancestral in the brown algae**

345 In agreement with the conclusion obtained by Silberfeld et al (2010), our analysis points  
346 towards an oogamous ancestor of brown algae, with several independent transitions towards  
347 anisogamous and isogamous clades. This stands in contrast with theoretical scenarios  
348 representing the evolution of gamete dimorphism from an isogamous ancestor (e.g.,  
349 Sanderson & Hurst 2001, Parker et al 1972; Charlesworth 1978, Lehtonen and Kokko 2011;  
350 Lehtonen et al 2016), in which isogamy is ancestral and anisogamy represents an  
351 intermediate step during the process of increased gametic differentiation. To our knowledge,  
352 the possible selective forces favouring reduced gamete dimorphism have not been explored  
353 by theoretical models. Theories based on disruptive selection caused by a trade-off between  
354 the number of gametes produced and zygote size (e.g., Parker et al 1972, Bulmer & Parker  
355 2002) have shown that the shape of the relation between zygote size and fitness is critical for  
356 the evolution of gamete dimorphism. It would be interesting to explore whether a change in  
357 the relation between zygote size and fitness (for example, due to a decrease in size of the  
358 diploid organism) may favour transitions from oogamy to anisogamy or isogamy. This type of  
359 evolutionary mechanism may generate a positive correlation between the degree of gamete  
360 dimorphism and the relative importance of the diploid phase, leading to an inversion of the  
361 causal relationship in Bell's (1994, 1997) hypothesis mentioned above, i.e., decrease in the  
362 size of the diploid organism would drive a decrease in gamete dimorphism.

363 Lehtonen and Kokko showed that evolution of anisogamy requires some level of gametic  
364 competition and limitation (Lehtonen and Kokko 2011). Therefore, it is likely that in specific  
365 conditions the system may return to isogamy or near isogamy, for instance if there is a low  
366 level of gamete competition or if there is no gamete limitation.

#### 367 **Evolution of gamete size and parthenogenetic capacity**

368 There are marked differences between the relative parthenogenetic capacities of male and  
369 female gametes in isogamous, anisogamous and oogamous brown algal species (Luthringer et  
370 al. 2015). Overall, both male and female gametes of isogamous species are capable of  
371 parthenogenesis, whereas only the female gametes of anisogamous species are  
372 parthenogenetic. In many oogamous species neither the male nor the female gametes  
373 undergo parthenogenesis. It has been suggested that increased gamete size leads to  
374 increased parthenogenetic capacity, up to a point, but that in oogamous species, the large

375 female gamete loses its flagella becoming specialised for zygote production and is no longer  
376 capable of initiating parthenogenetic development (Luthringer et al. 2015).

377 The gametes of the ancestral brown alga seem to have been unable to perform asexual  
378 reproduction through parthenogenesis, suggesting that the emergence of gamete  
379 parthenogenetic capacity was a derived, and perhaps adaptive trait for instance in marginal  
380 populations or other situations where mates are limited (Stalker 1956; Bierzychudek 1987;  
381 Oppliger et al. 2014). Data from field populations of a range of species would be needed to  
382 further understand whether parthenogenesis is adaptive. It is noteworthy that  
383 parthenogenetic capacity is assessed under laboratory conditions, and that the contribution  
384 of parthenogenesis to recruitment in natural populations would be worth exploring further  
385 (Oppliger et al. 2007, 2014). Note that a recent study in field populations of the *Ectocarpus*  
386 showed no evidence that parthenogenesis plays a significant role under field conditions  
387 (Couceiro et al. 2015). In contrast, studies in field populations of another brown algal species,  
388 *S. lomentaria* suggested that parthenogenesis is prevalent in field populations (Hoshino et al.  
389 2018). Interestingly, female-only parthenogenetic populations have larger gamete sizes  
390 relative to 'sexual' populations of the same species, consistent with a link between gamete  
391 size and parthenogenetic capacity, and opening the possibility that parthenogenesis may be  
392 an adaptive trait.

## 393 [Methods](#)

### 394 *Molecular data*

395 Alignments were based on the data published by Silberfeld and colleagues (Silberfeld et al.  
396 2010) that included five mitochondrial genes (*atp9*: mitochondrial ATP synthase subunit 9  
397 gene, *cox1* and *cox4*: Cytochrome c oxidase subunit 1 and 3 genes, *nad1* and *nad4*: NADH  
398 dehydrogenase subunit 1 and 4), four plastid genes (*rbcl*: large subunit of plastid encoded  
399 ribulose-1,5-biphosphate carboxylase oxygenase gene, *psaA*: photosystem I P700 chlorophyll  
400 a apoprotein A1 gene, *psbA*: photosystem II protein D1 gene, and *atpB*: ATP synthase subunit  
401 b gene), and a nuclear gene (*LSU*: large subunit of 28S rRNA gene). Our final tree contained  
402 131 species. To attribute trait states to the species in this tree we replaced some entities,  
403 depending on the availability of life-history information (i.e., kept the sequence data used to  
404 build the tree but used the data on life-history from another close relative) and added  
405 sequences from Genbank for species of the genera *Padina*, *Sargassum*, *Alaria* and  
406 *Ectocarpus* (Table S1). No information was available about the life histories of the closest  
407 relatives of the Phaeophyceae, e.g. Phaeothamniophyceae, so we used *Vaucheria*, a  
408 siphonous genus in the heterokont class Xanthophyceae for which life cycle and reproductive

409 trait information are available, as an outgroup. The final species list used for the trait analysis,  
410 for which we had life cycle and reproductive trait information, was comprised of 77 species,  
411 including the outgroup.

#### 412 *Phylogenetic reconstruction*

413 All sequences were aligned using MAFFT (Kato et al. 2009), and the best substitution model  
414 was estimated using the *phymtest* function in the *ape* R package (Paradis et al. 2004). The  
415 concatenated alignment was used for Bayesian Inference with *Beast* v1.8.2 (Drummond et al.  
416 2012) with three different gene partitions, for nuclear, plastid and mitochondrial genes. Each  
417 partition was unlinked for the substitution model. We used birth-death with incomplete  
418 sampling as tree prior, and four calibration nodes as described in (Silberfeld et al. 2010) (see  
419 nodes A to D, Figure 2). We used log-normal priors for two of the calibrations: *Padina*-like  
420 clade A, lognormal distribution (mean 5 Ma, sd 1, and lower boundary at 99.6 Ma);  
421 *Nereocystis-Pelagophycus* clade B: lognormal distribution (mean 20 Ma, sd 1, and lower  
422 boundary at 13 Ma), and normal priors for the root (Phaeophyceae root age D: normal  
423 distribution ( $\mu=155$ ,  $\text{sd}=30$  Ma), and the Sargassaceae node C to a normal distribution ( $\mu=60$ ,  
424  $\text{sd}=15$ , with lower boundary 13 Ma). Finally, the MCMC was set to 50 million generations with  
425 a sampling every 1,000. The posterior distribution was summarized using *Treeannotator*  
426 v1.7.0 (Drummond et al. 2012) to obtain a Common Ancestor Tree (Heled and Bouckaert  
427 2013). For the macroevolutionary analyses (see below), a set of 100 trees were sampled from  
428 the posterior distribution.

#### 429 *Life history traits*

430 Four life-history traits were recorded based on a literature review: life cycle type (haploid >  
431 diploid; haploid = diploid; haploid < diploid; diplont), sexual system (monoicous; dioicous;  
432 monoecious; dioecious), gamete dimorphism (isogamous; anisogamous; oogamous), and the  
433 occurrence of gamete parthenogenesis (no parthenogenesis; parthenogenesis in female  
434 gametes only; parthenogenesis in both male and female gametes). The traits were coded as  
435 discrete multi-state characters. A full explanation of each state is given in Table S2. We  
436 separated the respective traits into seven additional characters. For example, we transferred  
437 'gamete size' (iso-, aniso-, oogamous) into a continuous male gamete size trait. We  
438 furthermore recoded multi-state traits into binary data for the correlation tests (see below),  
439 such as the 'gamete dimorphism', which was recorded by separating the absence (0 =  
440 oogamy) from presence (1 = iso- or anisogamy) of female flagellated gametes. We  
441 categorized an additional sexual system trait as 'sexes occurring on the same thallus' (0 =  
442 monoicous or monoecious) or 'separate thalli' (1 = dioicous or dioecious). The life cycle was

443 simplified to the occurrence of a ‘dominant haploid phase’ (0 = haploid  $\geq$  diploid) versus  
444 dominance of the diploid phase (1 = haploid < diploid or diplontic), with dominance broadly  
445 meaning size of the adult individual. Finally, the occurrence of parthenogenesis was separated  
446 into two additional traits, absence (0) or presence (1) of male parthenogenesis, and absence  
447 of parthenogenesis (0) versus parthenogenesis occurring in at least one of the sexes (1), most  
448 commonly the female.

449 For simplicity, we coded as “isogamous” algae with physiological and behavioural anisogamy  
450 but that have been described as having no size difference between male and female gametes.  
451 Note that all brown algae exhibit an asymmetry between male and female, at least at the  
452 level of their behaviour, and potentially all the algae scored as isogamous have in fact subtle  
453 size differences but the literature is not detailed enough in this respect. For example, most  
454 representatives of the order Ectocarpales have been reported to be ‘isogamous’ (based on  
455 observations under the microscope, but without detailed measurements of gamete size), but  
456 some members (*Ectocarpus* sp., *Colpomenia peregrina* Sauvageau) as well as the last species  
457 branching off before the Ectocarpales, *Asterocladon interjectum*, have anisogamous male and  
458 female gametes.

459 The sister group to the Ectocarpales, the order Laminariales, is almost completely oogamous,  
460 with the exception of the genus *Saccharina*, which has been shown to have eggs with  
461 rudimentary flagella (Motomura and Sakai 2008) being therefore considered strongly  
462 anisogamous.

#### 463 *Ancestral state reconstructions*

464 A likelihood-based method was used to reconstruct the ancestral state of each of the four  
465 life-history traits. We fitted three different models of trait evolution using the function  
466 *fitDiscrete* from the R package Geiger (Harmon et al. 2008). These models differed in the  
467 number of transition rates as follows: *equal rates* (ER, a single transition rates between all  
468 states), *symmetric* (SYM, forward and reverse transitions are the same), and *all-rates-different*  
469 (ARD, each rate is a unique parameter). The corrected Akaike Information Criterion (AICc) was  
470 used to compare the alternative models. Each model was estimated on each 100  
471 phylogenetic trees sampled from the posterior distribution to account for uncertainty in tree  
472 topology and divergence times. State probabilities at the root and transition rates were  
473 summarized with the mean and standard deviation values of all iterations, to incorporate  
474 phylogenetic uncertainty.

475 We inferred the number of transitions between states, and their minimum timing, using  
476 stochastic character mapping (Huelsenbeck et al. 2003). One hundred stochastic mappings



477 were performed on the posterior sample of trees, and on each we divided branch lengths into  
478 time bins of 1 Myr and recorded the number of transitions from and to each state, in each bin  
479 (as described in (Serrano-Serrano et al. 2017). We reported the mean and standard deviation,  
480 and the time bin at which 60% of the stochastic mappings had at least one transition event as  
481 the onset time for each type of transition.

#### 482 *Correlation analyses*

483 We first assessed correlation between life history traits using a reversible-jump MCMC  
484 algorithm to test the correlation between two binary traits as implemented in *BayesTraits* V3  
485 (Pagel *et al.* 2004). This approach compared two models, a null model assuming that the traits  
486 had evolved independently, and an alternative model assuming that their evolution had been  
487 correlated. Each model was run for 10 million generations using the values found in the  
488 ancestral state reconstructions for the root state. The two models were compared through  
489 their log marginal likelihood by estimating the log Bayes factor. This approach was used to  
490 test the correlation between female parthenogenesis and the occurrence of sexes on the  
491 same versus separate thalli. Tests showing a significant support for the correlated model were  
492 presented as networks of evolutionary transitions using the R package *qgraph* (Epskamp *et al.*  
493 2012). Second, we used the implementation of the threshold model, *threshBayes* in the R  
494 package *phytools* (Revell 2014), to test for the correlation between a continuous and a  
495 discrete variable. The threshold model assumes that the states of discrete phenotype are  
496 governed by an unobserved continuous character called *liability*. These liabilities are assumed  
497 to evolve according to a Brownian motion model (Felsenstein 2012) and translate into  
498 discrete characters once they have passed certain thresholds. We used this model to test the  
499 correlation between male gamete size and two discrete traits, male parthenogenesis and  
500 sexes on the same or on separate thalli. For correlation analyses that were significant, we  
501 fitted an Ornstein–Uhlenbeck model of evolution to further test whether the continuous trait  
502 had two discrete selective regimes, determined by the discrete binary trait. We used the  
503 *OuWie* from the R package *OuWie* (Beaulieu *et al.* 2012), and compared the alternative  
504 models using the corrected Akaike Information Criterion (AICc)-selected model.

#### 505 FIGURES

506 **Figure 1.** Schematic illustration of sexual life cycles of representative brown algae. (A)  
507 *Scytosiphon lomentaria* (Lyngbye) Link: diplohaplontic, heteromorphic life cycle, haploid  
508 dominant; near-isogametes (B) *Ectocarpus* sp. (Dillwyn) Lyngbye: diplohaplontic, isomorphic  
509 life cycle, with similar dominance in haploid and diploid phases; near-isogametes; (C)  
510 *Saccorhiza polyschides* (Lightfoot) Batters: diplohaplontic, heteromorphic life cycle, with



511 diploid dominance ( $D \gg H$ ); oogamous; (D) *Fucus serratus* L.: diplontic life cycle, only diploid  
512 phase; oogamous. H=haploid phase; D=diploid phase.

513 **Figure 2.** Phylogenetic tree using Bayesian analyses in BEAST. Node numbers indicate the  
514 posterior Bayesian support, node bars represent the 95% HPD (Highest Posterior Density) for  
515 the divergence times.

516 **Figure 3.** Maximum likelihood ancestral state reconstructions for the four-brown algal life-  
517 history traits. Pie charts and colours at each node represent the probabilities for each state.  
518 Colours at the tips represent the species states (A, C, E, F). Estimated number of transitions  
519 through time for the corresponding four life-history traits (B, D, F, H). Coloured densities  
520 identify the mean number of events for each possible transition. Vertical lines and numbers  
521 denote the minimum age as the point in time where at least one transition is recorded in 60%  
522 of the reconstructions. A and B) Male and female gamete size; C and D) Sexual system, E and  
523 F) Type of life cycle, G and H) Parthenogenetic capacity.

524 **Figure 4.** Models of the correlation between traits in brown algae. Binary states are described  
525 at the bottom of each panel. Transition rates follow the nomenclature in BayesTraits software  
526 (<http://www.evolution.rdg.ac.uk/BayesTraitsV3.0.1/BayesTraitsV3.0.1.html>). Square boxes  
527 indicate the most likely ancestral state (see ancestral state estimations in Methods), sizes of  
528 squares/circles represent the abundance of each state in the set of sampled species, and  
529 arrow thickness is proportional to the rate of transition between states (see Table 2).

530 **Figure 5.** Phenogram for male gamete size and parameter estimation using Ornstein-  
531 Uhlenbeck (OU) model. Colours denote the absence ( $\theta_0$  in orange) and presence ( $\theta_1$  in  
532 purple) of parthenogenesis of male gametes.

### 533 TABLES

534 **Table 1.** Description of the traits studied, categories and discrete states. Note that some of  
535 the discrete traits were also treated as continuous traits (male gamete size for instance).

536 **Table 2.** Analysis of the ancestral states for each studied trait.

537 **Table 3.** Analysis of correlations between traits.

538 **Table 4.** Estimated rates of correlated transitions

### 539 SUPPLEMENTAL FIGURES

540 **Figure S1.** Phylogenetic tree pruned to the 43 species with sexual system and life cycle  
541 dominance traits recorded. Coloured squares at the tips represent the species state for sexual

542 system (left column) and phase dominance (right column). Colour codes for each binary trait  
543 are explained in the top left legend. Ancestral node states are not depicted, see Figure 3 for  
544 full ancestral state reconstruction.

545 **Figure S2.** Evolutionary correlation between continuous and discrete traits using the threshold  
546 model. **A**, Correlation between the size of male gametes and presence of sexes on  
547 same/different individual (unisexual versus co-sexuals). **B**, Correlation between the size of  
548 male gametes and male parthenogenesis. Blue histograms (left panel) denotes the posterior  
549 density for the correlation between traits. Posterior liabilities, or unobserved continuous  
550 traits, for each discrete trait (right panel). HPD: highest posterior density.

#### 551 **SUPPLEMENTAL TABLES**

552 **Table S1:** Accession number for the sequences of the species that were not included in  
553 (Silberfeld et al. 2010).

554 **Table S2:** List of detailed life cycle and reproductive traits across the brown algal species

#### 555 **SUPPLEMENTAL DATASET**

556 Details of all the traits and species used in this work, including references.

#### 557 **FUNDING**

558 This work was supported by the CNRS, Sorbonne Université and the ERC (grant agreement  
559 638240).

560

561

#### 562 **REFERENCES**

563 Bell, G. 1982. *The Masterpiece of Nature: The Evolution and Genetics of Sexuality*. University  
564 of California Press, Berkeley.

565 Bell, G. 1997. The evolution of the life cycle of brown seaweeds. *Biol. J. Linn. Soc.* 60:21–38.

566 Bierzychudek, P. 1987. Patterns in plant parthenogenesis. *Experientia. Suppl.* 55:197–217.

- 567 Billiard, S., M. Lopez-Villavicencio, B. Devier, M. E. Hood, C. Fairhead, and T. Giraud. 2011.  
568 Having sex, yes, but with whom? Inferences from fungi on the evolution of anisogamy  
569 and mating types. *Biol. Rev. Camb. Philos. Soc.* 86:421–442.
- 570 Bothwell, J. H., D. Marie, A. F. Peters, J. M. Cock, and S. M. Coelho. 2010. Role of  
571 endoreduplication and apomeiosis during parthenogenetic reproduction in the model  
572 brown alga *Ectocarpus*. *New Phytol.* 188:111–121.
- 573 Bulmer, M. G., and G. A. Parker. 2002. The evolution of anisogamy: a game-theoretic  
574 approach. *Proc. Biol. Sci.* 269:2381–2388.
- 575 Charlesworth, B. 1978. The population genetics of anisogamy. *J. Theor. Biol.* 73:347–357.
- 576 Clayton. 2009. Evolution and Life Histories of Brown Algae. *Bot. Mar.* 31:379.
- 577 Cock, J. M., O. Godfroy, N. Macaisne, A. F. Peters, and S. M. Coelho. 2014. Evolution and  
578 regulation of complex life cycles: a brown algal perspective. *Curr. Opin. Plant Biol.*  
579 17:1–6.
- 580 Coelho, S. M., J. Gueno, A. P. Lipinska, J. M. Cock, and J. G. Umen. 2018. UV Chromosomes  
581 and Haploid Sexual Systems. *Trends Plant Sci.* 23:794–807.
- 582 Coelho, S. M., A. F. Peters, B. Charrier, D. Roze, C. Destombe, M. Valero, and J. M. Cock. 2007.  
583 Complex life cycles of multicellular eukaryotes: New approaches based on the use of  
584 model organisms. *Gene* 406:152–170.
- 585 Couceiro, L., M. Le Gac, H. M. Hunsperger, S. Mauger, C. Destombe, J. M. Cock, S. Ahmed, S.  
586 M. Coelho, M. Valero, and A. F. Peters. 2015. Evolution and maintenance of haploid-  
587 diploid life cycles in natural populations: The case of the marine brown alga  
588 *Ectocarpus*. *Evol. Int. J. Org. Evol.* 69:1808–1822.

- 589 Cox, P. A., and J. A. Sethian. 1984. Search, encounter rates, and the evolution of anisogamy.  
590 Proc. Natl. Acad. Sci. U. S. A. 81:6078–6079.
- 591 Dawley, R., and J. Bogart. 1989. The evolution and ecology of unisexual vertebrates. Albany,  
592 NY : The New York State Museum .
- 593 Drummond, A. J., M. A. Suchard, D. Xie, and A. Rambaut. 2012. Bayesian phylogenetics with  
594 BEAUti and the BEAST 1.7. Mol. Biol. Evol. 29:1969–1973.
- 595 Dusenbery, D. B. 2000. Selection for high gamete encounter rates explains the success of  
596 male and female mating types. J. Theor. Biol. 202:1–10.
- 597 Gibson, M. 1994. Reproduction in *Cladostephus spongiosus* in southern Australia  
598 (*Sphacelariales*, *Phaeophyceae*). Phycologia 33:378–383.
- 599 Goldberg, E. E., S. P. Otto, J. C. Vamosi, I. Mayrose, N. Sabath, R. Ming, and T.-L. Ashman.  
600 2017. Macroevolutionary synthesis of flowering plant sexual systems. Evol. Int. J. Org.  
601 Evol. 71:898–912.
- 602 Hanschen, E. R., M. D. Herron, J. J. Wiens, H. Nozaki, and R. E. Michod. 2018. Repeated  
603 evolution and reversibility of self-fertilization in the volvocine green algae. Evol. Int. J.  
604 Org. Evol. 72:386–398.
- 605 Harmon, L. J., J. T. Weir, C. D. Brock, R. E. Glor, and W. Challenger. 2008. GEIGER: investigating  
606 evolutionary radiations. Bioinforma. Oxf. Engl. 24:129–131.
- 607 Heled, J., and R. R. Bouckaert. 2013. Looking for trees in the forest: summary tree from  
608 posterior samples. BMC Evol. Biol. 13:221.
- 609 Hoekstra, R. F. 1987. The evolution of sexes. Experientia. Suppl. 55:59–91.

- 610 Hoekstra, R. F. 1980. Why do organisms produce gametes of only two different sizes? Some  
611 theoretical aspects of the evolution of anisogamy. *J. Theor. Biol.* 87:785–793.
- 612 Hoshino, M., T. Okino, and K. Kogame. 2018. Parthenogenetic female populations in the  
613 brown alga *Scytosiphon lomentaria* (Scytosiphonaceae, Ectocarpales): decay of a  
614 sexual trait and acquisition of asexual traits. *J. Phycol.*, doi: 10.1111/jpy.12812.
- 615 Huelsenbeck, J. P., R. Nielsen, and J. P. Bollback. 2003. Stochastic mapping of morphological  
616 characters. *Syst. Biol.* 52:131–158.
- 617 Kafer, J., G. A. B. Marais, and J. R. Pannell. 2017. On the rarity of dioecy in flowering plants.  
618 *Mol. Ecol.* 26:1225–1241.
- 619 Katoh, K., G. Asimenos, and H. Toh. 2009. Multiple alignment of DNA sequences with MAFFT.  
620 *Methods Mol. Biol. Clifton NJ* 537:39–64.
- 621 Kuhlenkamp, R., and D. G. Müller. 1985. Culture studies on the life history of *Haplospora*  
622 *globosa* and *Tilopteris mertensii* (Tilopteridales, Phaeophyceae).
- 623 Lehtonen, J., and H. Kokko. 2011. Two roads to two sexes: Unifying gamete competition and  
624 gamete limitation in a single model of anisogamy evolution.
- 625 Luthringer, R., A. Cormier, A. F. Peters, J. M. Cock, and S. M. Coelho. 2015. Sexual dimorphism  
626 in the brown algae. *Perspectives in Phycology* 1:11–25.
- 627 Mable, B. K., and S. P. Otto. 1998. The evolution of life cycles with haploid and diploid phases.  
628 *BioEssays* 20:453–462.
- 629 Motomura, T., and Y. Sakai. 2008. The occurrence of flagellated eggs in *Laminaria angustata*  
630 (Phaeophyta, Laminariales) (Note).

- 631 Oppliger, L. V., J. A. Correa, and A. F. Peters. 2007. Parthenogenesis in the brown alga  
632 *Lessonia nigrescens* (Laminariales, Phaeophyceae) from central Chile<sup>1\*</sup>. *J. Phycol.*  
633 43:1295–1301.
- 634 Oppliger, L. V., P. von Dassow, S. Bouchemousse, M. Robuchon, M. Valero, J. A. Correa, S.  
635 Mauger, and C. Destombe. 2014. Alteration of Sexual Reproduction and Genetic  
636 Diversity in the Kelp Species *Laminaria digitata* at the Southern Limit of Its Range. *PLoS*  
637 *ONE* 9:e102518.
- 638 Otto, S. P., and A. C. Gerstein. 2008. The evolution of haploidy and diploidy. *Curr. Biol.* CB  
639 18:R1121-1124.
- 640 Otto, S. P., and J. C. Marks. 1996. Mating systems and the evolutionary transition between  
641 haploidy and diploidy. *Biol. J. Linn. Soc.* 57:197–218.
- 642 Pannell, J. R. 2017. Plant Sex Determination. *Curr. Biol.* CB 27:R191–R197.
- 643 Paradis, E., J. Claude, and K. Strimmer. 2004. APE: Analyses of Phylogenetics and Evolution in  
644 R language. *Bioinforma. Oxf. Engl.* 20:289–290.
- 645 Parker, G. A. 1978. Selection on non-random fusion of gametes during the evolution of  
646 anisogamy. *J. Theor. Biol.* 73:1–28.
- 647 Parker, G. A., R. R. Baker, and V. G. Smith. 1972. The origin and evolution of gamete  
648 dimorphism and the male-female phenomenon. *J. Theor. Biol.* 36:529–553.
- 649 Randerson, J. P., and L. D. Hurst. 2001. A comparative test of a theory for the evolution of  
650 anisogamy. *Proc. Biol. Sci.* 268:879–884.

- 651 Serrano-Serrano, M. L., J. Rolland, J. L. Clark, N. Salamin, and M. Perret. 2017. Hummingbird  
652 pollination and the diversification of angiosperms: an old and successful association in  
653 Gesneriaceae. *Proc. Biol. Sci.* 284.
- 654 Silberfeld, T., J. W. Leigh, H. Verbruggen, C. Cruaud, B. de Reviers, and F. Rousseau. 2010. A  
655 multi-locus time-calibrated phylogeny of the brown algae (Heterokonta, Ochrophyta,  
656 Phaeophyceae): Investigating the evolutionary nature of the “brown algal crown  
657 radiation”. *Mol. Phylogenet. Evol.* 56:659–674.
- 658 Stalker, H. D. 1956. ON THE EVOLUTION OF PARTHENOGENESIS IN LONCHOPTERA (DIPTERA).  
659 *Evolution* 10:345–359.
- 660 Togashi, T., J. L. Bartelt, J. Yoshimura, K. Tainaka, and P. A. Cox. 2012. Evolutionary trajectories  
661 explain the diversified evolution of isogamy and anisogamy in marine green algae.  
662 *Proc. Natl. Acad. Sci. U. S. A.* 109:13692–13697.
- 663 Valero, M., S. Richerd, V. Perrot, and C. Destombe. 1992. Evolution of alternation of haploid  
664 and diploid phases in life cycles. *Trends Ecol. Evol.* 7:25–29.
- 665 Villarreal, J. C., and S. S. Renner. 2013. Correlates of monoicy and dioicy in hornworts, the  
666 apparent sister group to vascular plants. *BMC Evol. Biol.* 13:239.
- 667
- 668



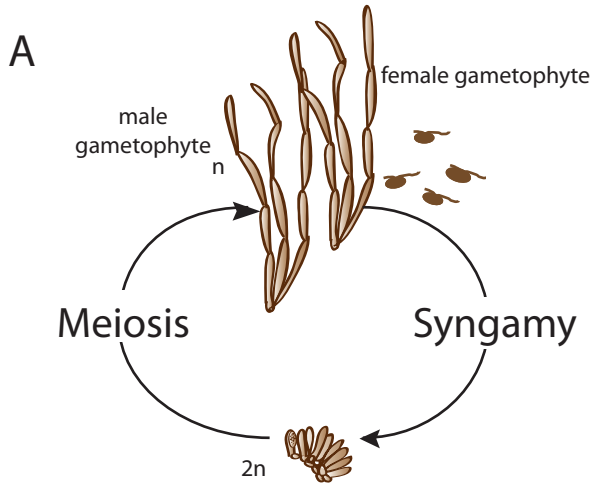

Diplohaplontic, anisomorphic life cycle  
Haploid phase dominant  
e.g. *Scytosiphon lomentaria*

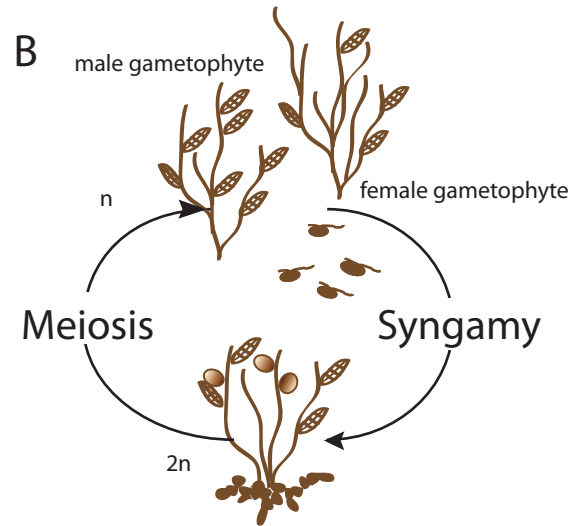

Diplohaplontic, anisomorphic life cycle  
Haploid phase = Diploid phase  
e.g. *Ectocarpus* sp.

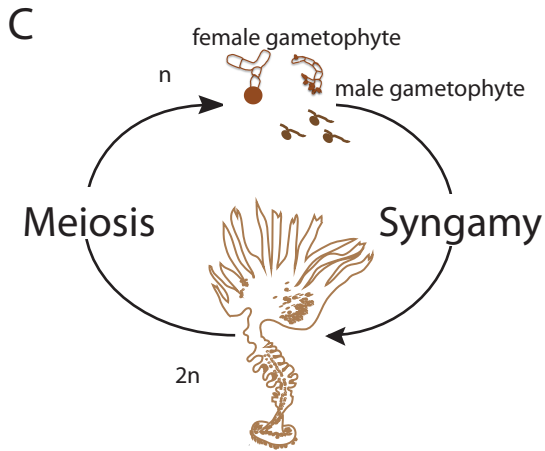

Diplohaplontic, anisomorphic life cycle  
Diploid phase dominant  
e.g. *Saccorhiza polyschides*

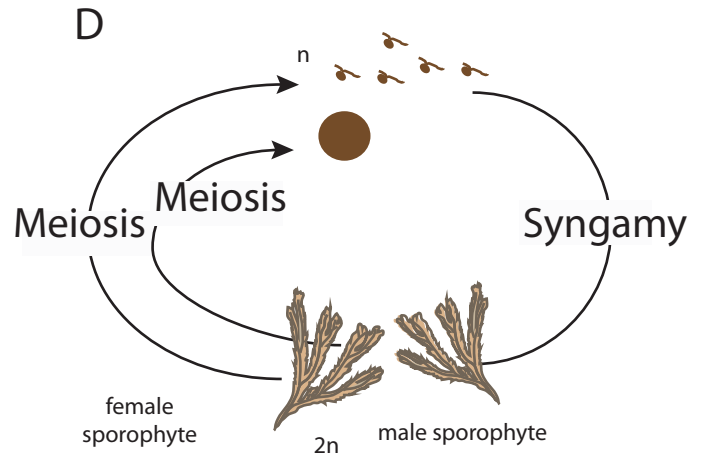

Diplontic  
Diploid phase only  
e.g. *Fucus serratus*

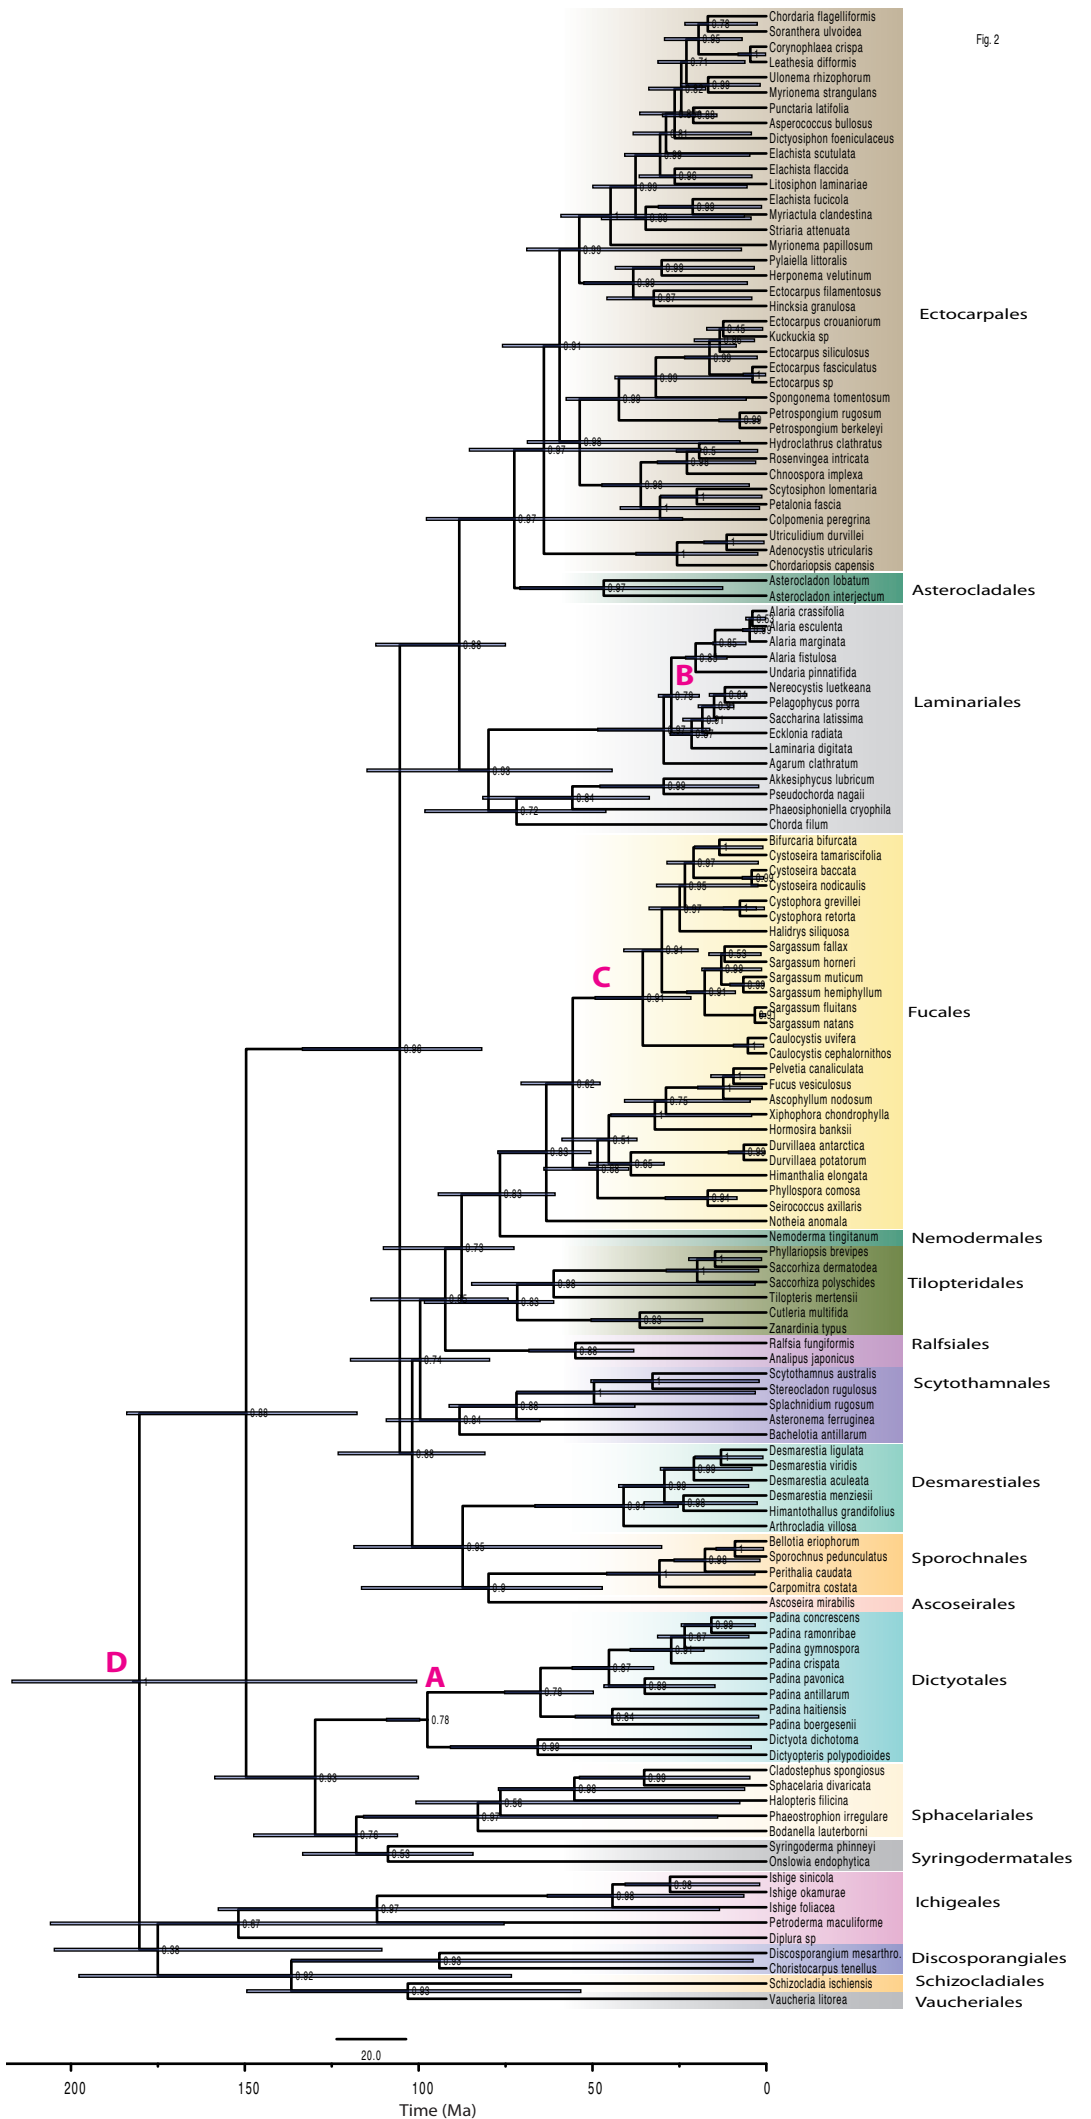

D

B

C

A

Ectocarpales

Asterocladales

Laminariales

Fucales

Nemodermales

Tilopteridales

Ralfsiales

Scythothamniales

Desmarestiales

Sporochneales

Ascoseirales

Dictyotales

Sphacelariales

Syringodermatales

Ichigeales

Discosporangiales

Schizocladales

Vaucheriales

Time (Ma)

A

## Life cycle

- Haploid >> Diploid
- Haploid = Diploid
- Diploid >> Haploid
- Only diploid

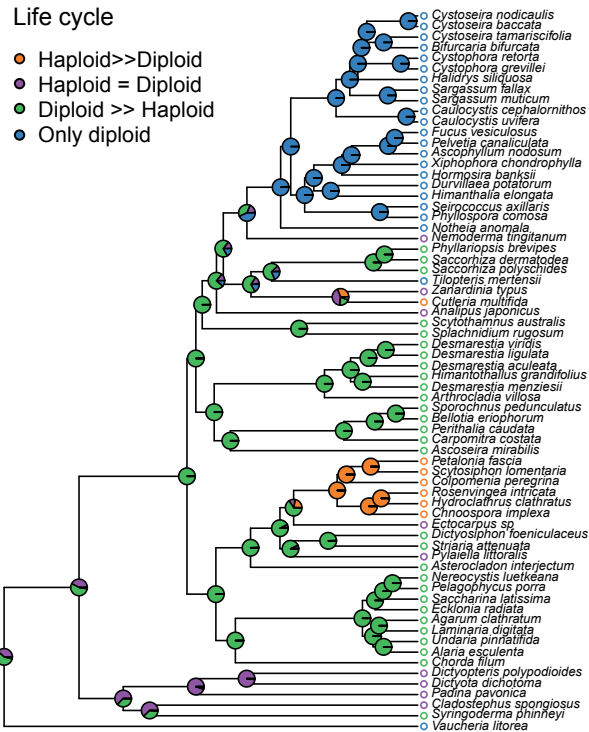

C

## Sexual system

- Monoicous
- Dioicous
- Monoecious
- Dioecious

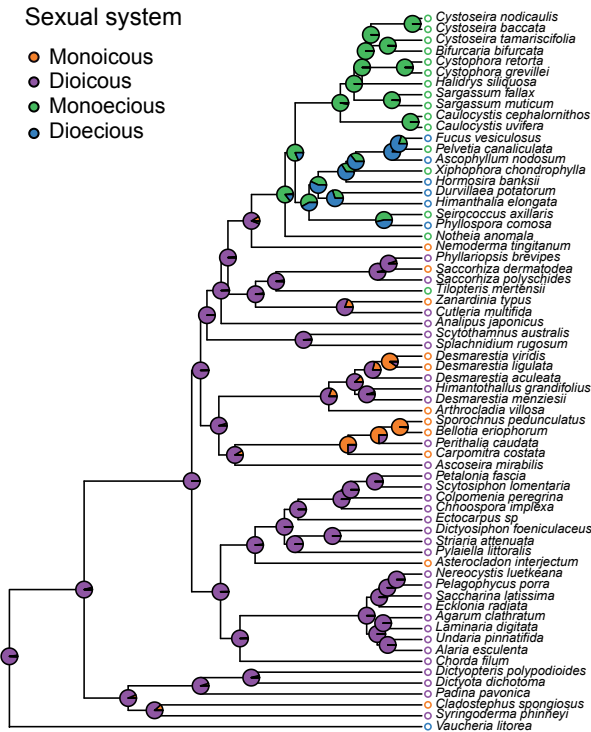

E

## Male/Female gamete size

- Isogamy
- Anisogamy
- Oogamy

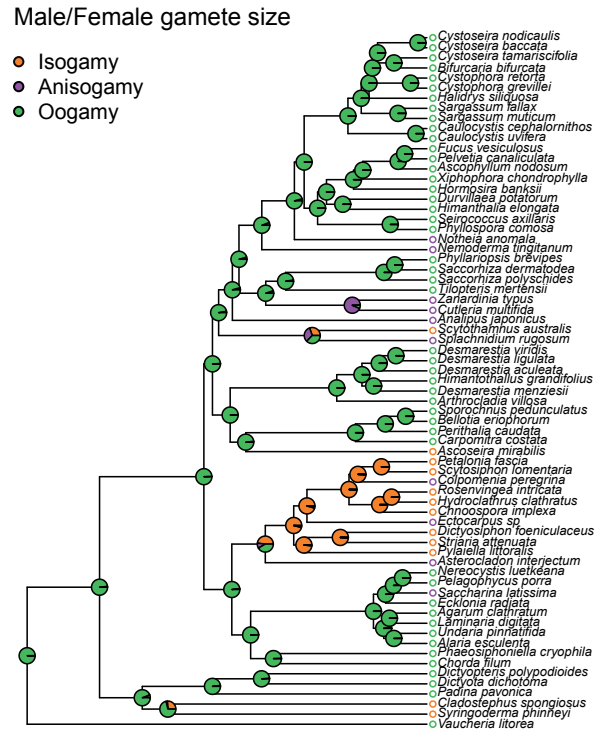

G

## Parthenogenesis

- No parthenogenesis
- Female
- Male and female

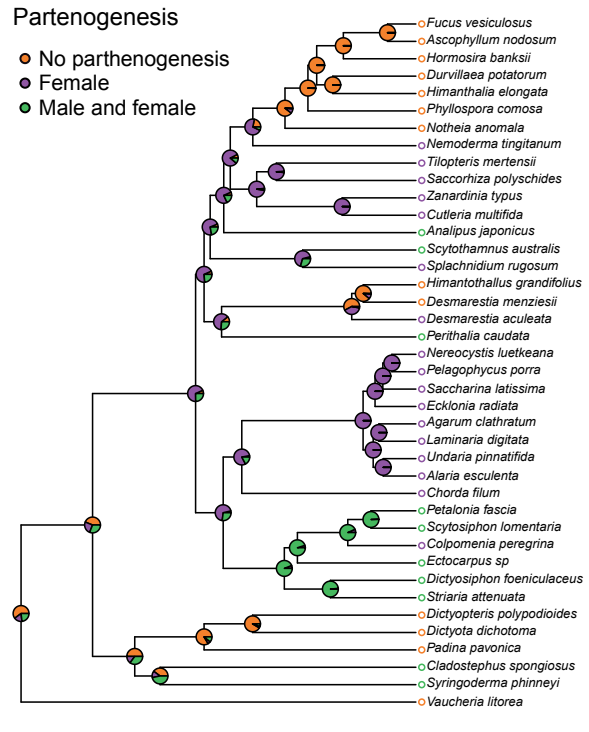

B

## Life cycle

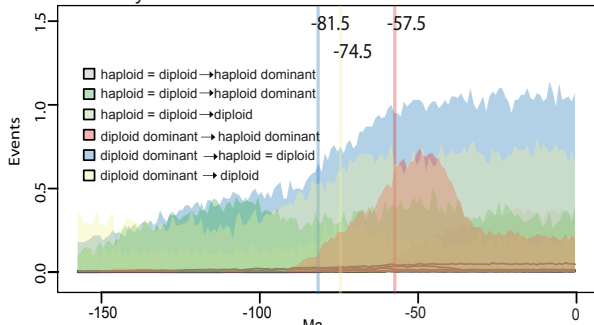

D

## Sexual system

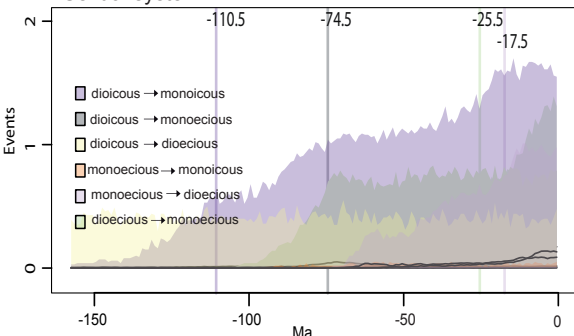

F

## Gamete dimorphism

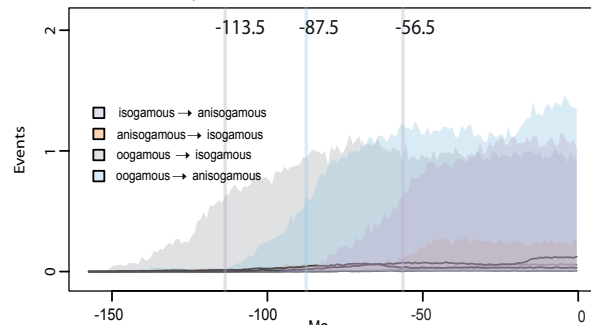

H

## Parthenogenesis

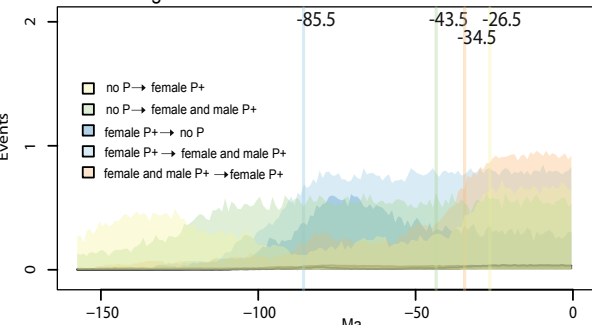

Fig. 4

### Correlation between sexual system and life cycle dominance

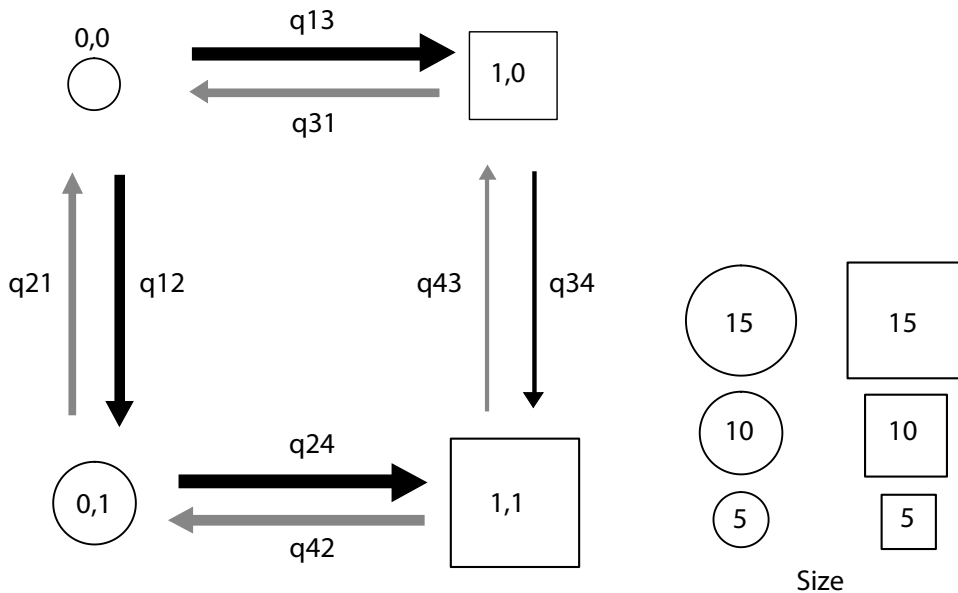

0,0 : monoicous, haploid dominant

0,1 : monoicous, diploid dominant

1,0 : dioicous, haploid dominant

1,1 : dioicous, diploid dominant

Fig. 5

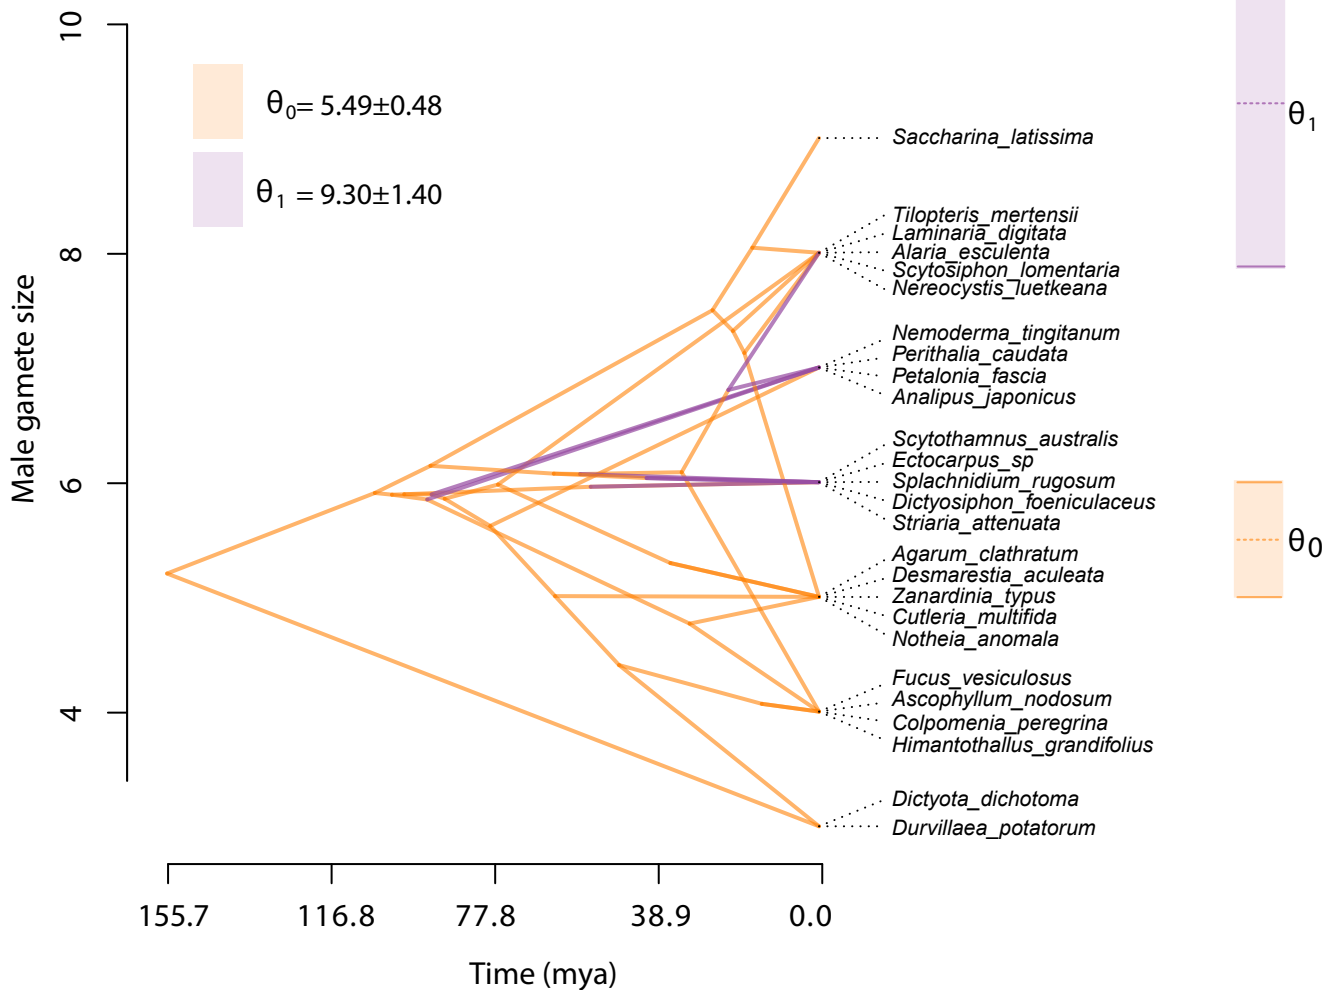

**Table 1.** Description of the traits studied, categories and discrete states. Note that some of the discrete traits were also treated as continuous traits (male gamete size for instance).

|                        | Category                       | States                                        | Description                                                                                                      |
|------------------------|--------------------------------|-----------------------------------------------|------------------------------------------------------------------------------------------------------------------|
| <b>Life cycle</b>      | Haplo-diplontic                | Haplo-diplontic haploid dominant <sup>1</sup> | Life cycle with both haploid and diploid mitosis, with dominant gametophyte haploid generation                   |
|                        |                                | Haplo-diplontic haploid = diploid             | Life cycle with both haploid and diploid mitosis, with equal dominance of gametophyte and sporophyte generations |
|                        |                                | Haplo-diplontic diploid dominant <sup>1</sup> | Life cycle with both haploid and diploid mitosis, with dominant sporophyte (diploid) generation                  |
|                        | Diplontic                      | Diplontic                                     | Life cycle with no haploid mitosis, the haploid phase is limited to gametes                                      |
| <b>Sexual system</b>   | Haploid sex determination      | Monoicous                                     | Haploid phase sex determination, where both gamete types are produced by the same haploid gametophyte.           |
|                        |                                | Dioicous                                      | Haploid phase sex or mating type determination, with genetically distinct gametophytes corresponding to each sex |
|                        | Diploid sex determination      | Dioecious                                     | Diploid phase sex-determination, with genetically distinct sporophytes corresponding to each sex                 |
|                        |                                | Monoecious                                    | Diploid phase sex determination, where both male and female organs are produced by the same diploid sporophyte   |
| <b>Gamete size</b>     | Female gamete with flagella    | Isogamous <sup>2</sup>                        | Male and female gametes with small size difference (but different behaviour/physiology)                          |
|                        |                                | Anisogamous                                   | Male and female gametes of clearly different size, both with flagella                                            |
|                        | Female gamete without flagella | Oogamous                                      | Female gamete much larger and lacking a flagellum                                                                |
| <b>Parthenogenesis</b> | No parthenogenesis             | No parthenogenesis                            | No parthenogenesis capacity in either gamete                                                                     |
|                        | Parthenogenesis                | Female gametes only                           | Only female gametes capable of parthenogenesis                                                                   |
|                        |                                | Male and female gametes                       | Male and female gametes capable of parthenogenesis                                                               |

<sup>1</sup>The term "dominant" is defined here as the generation that presents larger size and higher complexity in terms of morphology (number of different cell types, number of tissues and organs)

<sup>2</sup>For simplicity, we code as "isogamous" algae that have almost imperceptible size differences between male and female gametes, but note that in the brown algae there is always an asymmetry (at least in terms of physiology and behaviour) between male and female gametes.

**Table 2.** Analysis of the ancestral states for each studied trait.

| Trait           | Description                                            | No. species | Best Model | Mean rates (SD) <sup>1</sup>                                                                                                            | Root state (prob) <sup>2</sup>                 | Mean No. transitions (SD)                                                          | Min time of transition (60% recons, and SD) <sup>3</sup>                                  |
|-----------------|--------------------------------------------------------|-------------|------------|-----------------------------------------------------------------------------------------------------------------------------------------|------------------------------------------------|------------------------------------------------------------------------------------|-------------------------------------------------------------------------------------------|
| Life cycle      | 0: Hap>>Dip, 1: Hap=Dip, 2: Hap<<Dip, 3: Dip           | 68          | ER         | 0.00135 (1.1e-4)                                                                                                                        | 0: 0.00117, 1: 0.39560, 2: 0.56764, 3: 0.03559 | 1→0: 1 (0.6), 1→2: 1 (0.9), 1→3 :1 (0.7), 2→0: 1 (0.7), 2→1: 5 (1.5), 2→3: 2 (0.8) | 2→0: 57.5 My (5.05), 2→1: 81.5 My (23.55), 2→3: 74.5 My (21.41)                           |
| Sexual system   | 0: monoicous, 1: dioicous, 2: monoecious, 3: dioecious | 66          | SYM        | 0>1: 0.00515 (4.7e-4), 0>2: 0.00000 (4.1e-6), 0>3: 0.00057 (5.1e-4), 1>2: 0.00102 (1.3e-4), 1>3: 0.00000 (0.000), 2>3: 0.01180 (1.2e-3) | 0: 0.02361, 1: 0.96346, 2: 0.01228, 3: 0.00065 | 1→0: 8 (0.9), 1→2: 2 (0.4), 1→3 :1 (0.2), 2→0: 1 (0.2), 2→3: 3 (1.8), 3→2: 2 (1.3) | 1->0: 110.5 My (30.02), 1->2: 74.5 My (21.79), 2->3: 17.5 My (5.34), 3->2: 25.5 My (7.65) |
| Gamete size     | 0: isogamy, 1: anisogamy, 2: oogamy                    | 69          | ER         | 0.00236 (1.8e-04)                                                                                                                       | 0:0.00118, 1:0.00029, 2:0.99854                | 0→1: 2 (0.8), 1→0: 3 (0.8), 2→0: 2 (0.8), 2→1: 8 (1.1)                             | 0->1: 56.5 My (16.6), 2->0: 113.5 My (33.05), 2->1: 87.5 My (25.28)                       |
| Parthenogenesis | 0: Nobody, 1: only female, 2: female and male          | 40          | ER         | 0.00288 (2.4e-4)                                                                                                                        | 0: 0.59786, 1: 0.16131, 2: 0.24082             | 0->1: 1 (1.2), 0→2: 2 (1.4), 1→0: 2 (1.4), 1→2: 4 (1.9), 2→1: 1 (1.8)              | 0->1: 26.5 My (7.94), 0->2: 43.5 My (14.86), 1->2: 85.5 My (24.97), 2->1: 34.5 My (10.25) |

<sup>1</sup>Rates are the mean and sd values of the optimization in a sample of 100 posterior trees.

<sup>2</sup>Probability of the root is the mean over 100 reconstructions

<sup>3</sup>Stochastic mapping analysis and time where 60% of the reconstructions that have at least 1 transition

ER: a single transition rate between all states

SYM: forward and reverse transitions are the same

ARD: each rate is a unique parameter



Table 3. Analysis of correlations between traits.

| <i>Continuous versus discrete</i>                |                               |                                                                                          |                |                                                                                         |                 |                 |                |
|--------------------------------------------------|-------------------------------|------------------------------------------------------------------------------------------|----------------|-----------------------------------------------------------------------------------------|-----------------|-----------------|----------------|
| Trait 1                                          | Trait 2                       | Hypothesis                                                                               | No. of species | Assumptions on the root                                                                 | r               | HPD r           | ESS            |
| Male gamete size (continuous)                    | Separate sexes/co-sexuals     | Separate sexes may tend to have smaller and more abundant gametes to ensure reproduction | 38             | NA                                                                                      | 0.0908          | -0.3670, 0.5566 | 525            |
| Male gamete size (continuous)                    | Male parthenogenesis capacity | There is a minimum male gamete size where parthenogenesis is not possible                | 26             | NA                                                                                      | <b>0.4242**</b> | -0.0616, 0.8494 | 390            |
| <i>Two discrete binary traits</i>                |                               |                                                                                          |                |                                                                                         |                 |                 |                |
| Trait 1                                          | Trait 2                       | Hypothesis                                                                               | No. of species | Assumptions on the root                                                                 | InL Indep       | InL Dep         | Log BF*        |
| Separate sexes/co-sexuals                        | Parthenogenesis in female     | Separate sexes may promote parthenogenesis as a mechanism to ensure reproduction         | 40             | 1,0 = Sexes on separate thallus, no parthenogenesis in female                           | -38.9826        | -40.8219        | <b>-3.6787</b> |
| Sexual system (only monoicous and dioicous taxa) | Life cycle dominance          | Monoicous species are expected to have haploid dominant phase                            | 43             | 1,0 and 1,1 = Dioicous, but for the life cycle dominance both states could be the root. | -50.7461        | -48.9906        | <b>3.5110</b>  |
| Level of gamy (isogamous versus anisogamous)     | Life cycle dominance          | Anisogamous species are expected to have dominant diploid stages                         | 68             | 1,1=anisogamy, diploid dominant                                                         | -50.7400        | -50.7940        | -0.1080        |

\*BF > 2 is considered evidence of the dependent model

ESS: effective sample size

HPD: highest posterior density

\*\*significant different from zero according to the threshold model

Table 4. Estimated rates of correlated transitions

| Rate | State from | State to | Sexual system and life cycle dominance |        |
|------|------------|----------|----------------------------------------|--------|
|      |            |          | Mean                                   | sd     |
| q12  | 0,0        | 0,1      | 0.0118                                 | 0.1683 |
| q13  | 0,0        | 1,0      | 0.0153                                 | 0.1682 |
| q21  | 0,1        | 0,0      | 0.0080                                 | 0.0090 |
| q24  | 0,1        | 1,1      | 0.0160                                 | 0.1682 |
| q31  | 1,0        | 0,0      | 0.0094                                 | 0.1683 |
| q34  | 1,0        | 1,1      | 0.0036                                 | 0.1681 |
| q42  | 1,1        | 0,1      | 0.0105                                 | 0.1682 |
| q43  | 1,1        | 1,0      | 0.0034                                 | 0.1681 |
